# Supplementary figures and images for: Mammary Analogue Secretory Carcinoma Arising in the Parotid Gland of Child
Source: PubMed Central journal article supplement — Plast Reconstr Surg Glob Open. 2018 Dec 13;6(12):e2059. doi: 10.1097/GOX.0000000000002059 (PMC6326613; doi:10.1097/gox.0000000000002059), 2018-12-13

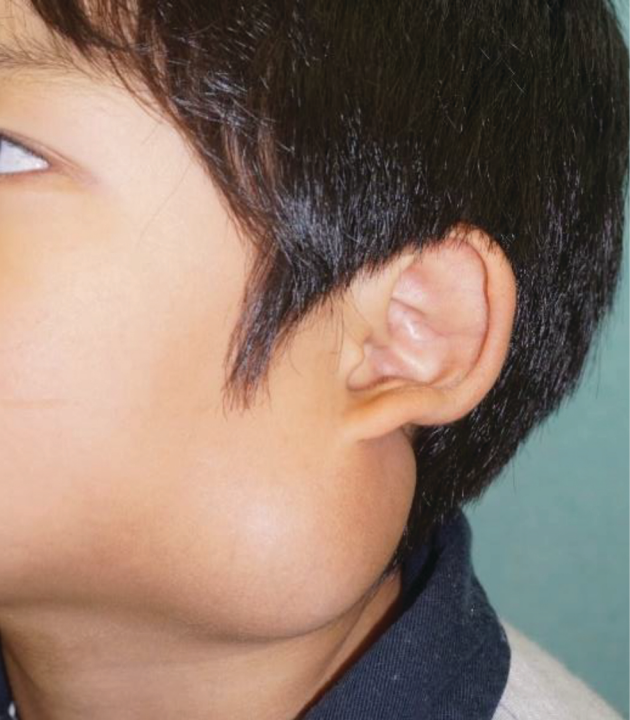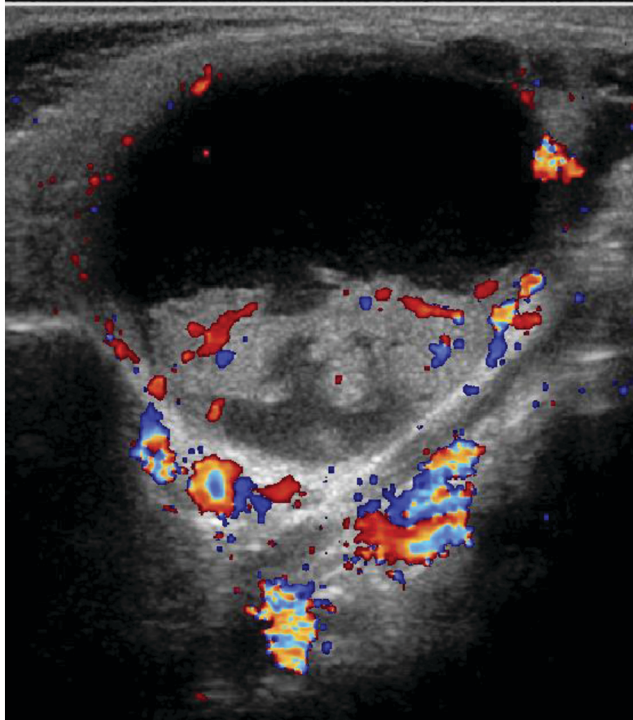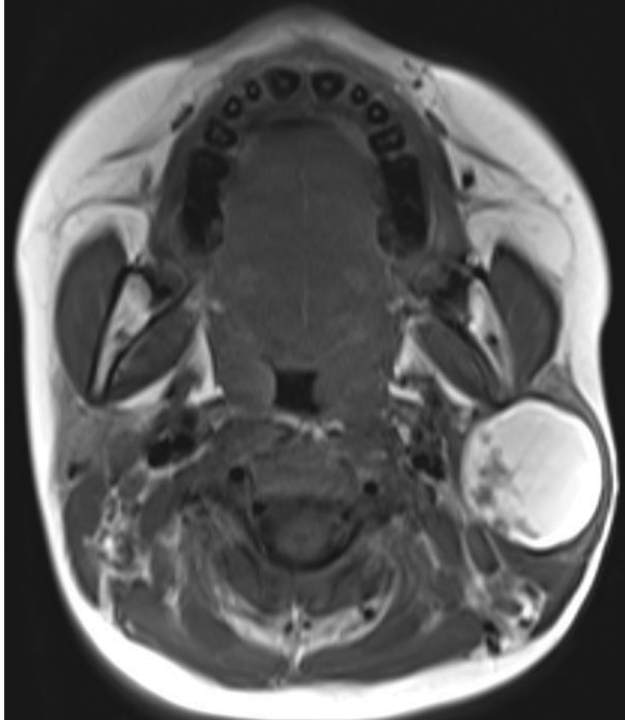

Supplement: gox-6-e2059-s001.pdf [file gox-6-e2059-s001.pdf]
